# Supplementary material for: Profiles of immune cell infiltration in head and neck squamous carcinoma
Source: PubMed Central journal article supplement (PMC7042147; doi:10.1042/bsr20192724), 2020-02-25
Supplement: BSR-2019-2724_supp.pdf [file BSR-2019-2724_supp.pdf]

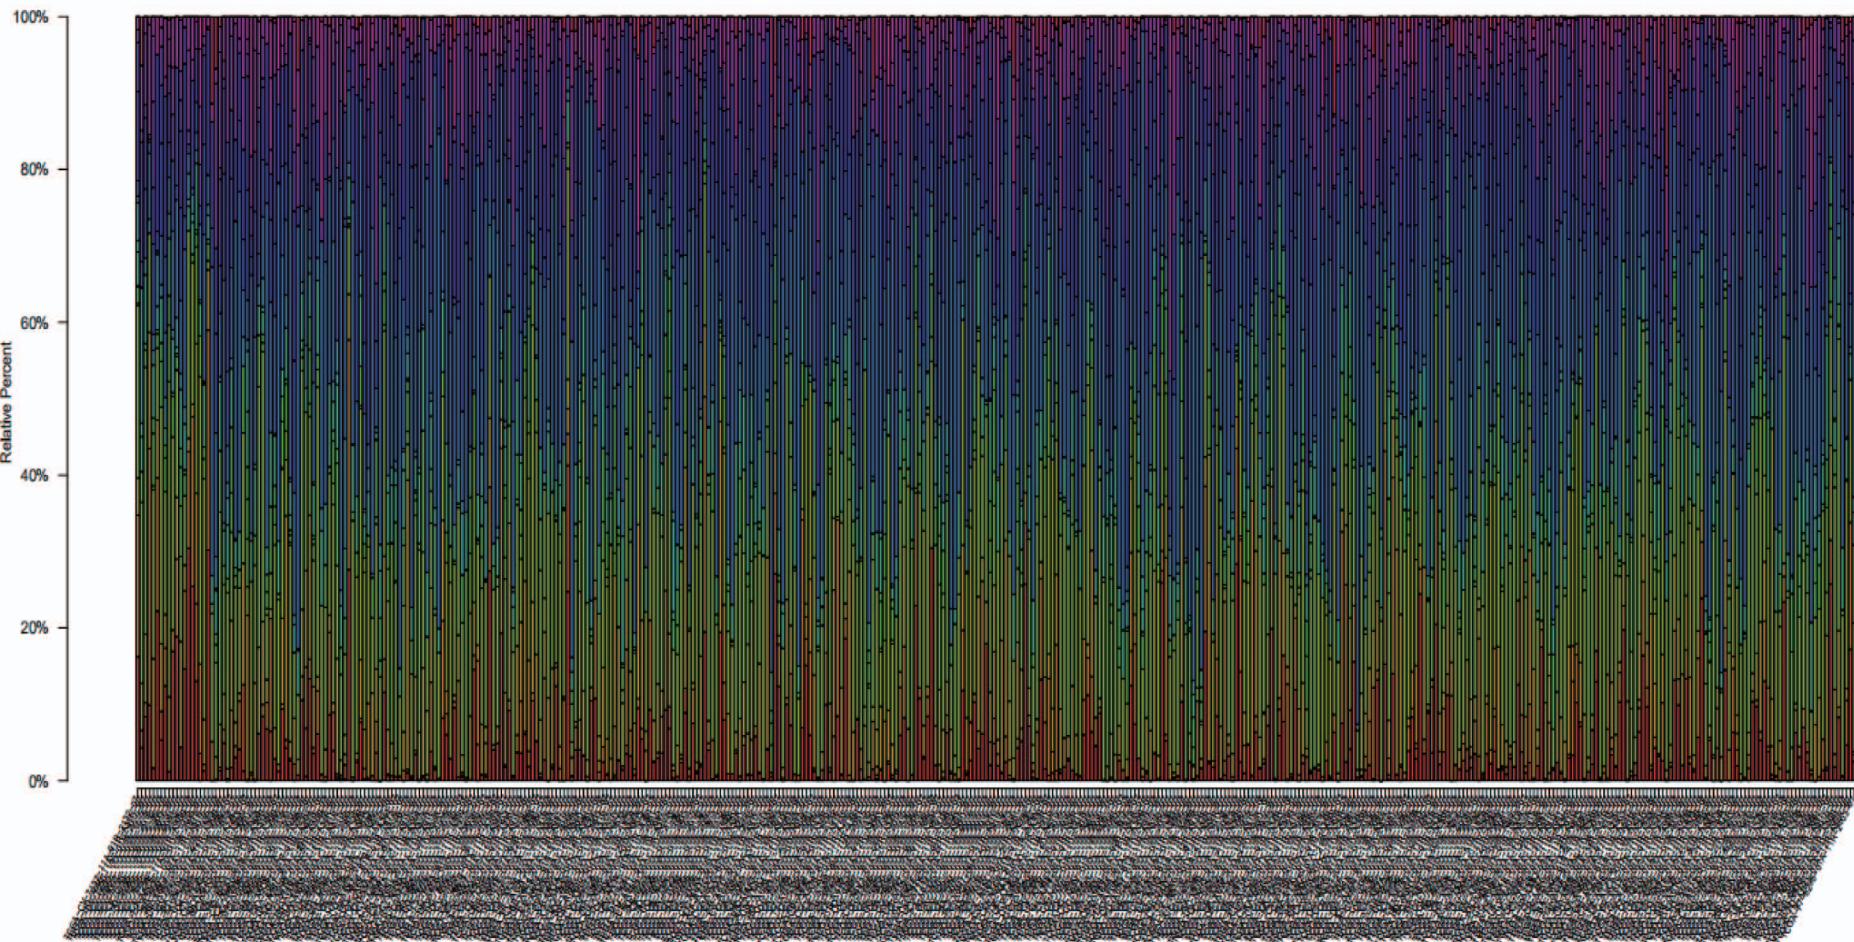

- B cells naive
- B cells memory
- Plasma cells
- T cells CD8
- T cells CD4 naive
- T cells CD4 memory resting
- T cells CD4 memory activated
- T cells follicular helper
- T cells regulatory (Tregs)
- T cells gamma delta
- NK cells resting
- NK cells activated
- Monocytes
- Macrophages M0
- Macrophages M1
- Macrophages M2
- Dendritic cells resting
- Dendritic cells activated
- Mast cells resting
- Mast cells activated
- Eosinophils
- Neutrophils

Figure S1. The relative percent of 22 TIICs in HNSC samples



Figure S2. PPI network of common DEGs in STRING database. The minimum required interaction score was set as 0.4.
